# Supplementary material for: Proteome Analysis and Serological Characterization of Surface-Exposed Proteins of Rickettsia heilongjiangensis
Source: PLoS One. 2013 Jul 23;8(7):e70440. doi: 10.1371/journal.pone.0070440 (PMC3720918; doi:10.1371/journal.pone.0070440)
Supplement: Table S1 — Primer pairs designed to amplify genes encoding the surface-exposed proteins of Rickettsia heilongjiangensis . (XLS) [file pone.0070440.s001.xls]

## Sheet: Sheet1
Table S1. Primer pairs designed to amplify genes encoding the surface-exposed proteins of Rickettsia heilongjiangensis.
Gene symbol	GI	Forward Primer (5'-3')	Reverse Primer (5'-3')	Vector	Competent cell	Start site	Termination site	Length (bp)
adr1	341584429	ATGGATCCTCGATGTCATCATCTGTG	AGCTCGAGAACTTTATCCCCGTCAAT	pET32a	BL21 (DE3)	109	690	582
adr2	341584430	GTGAATTCTTTGCTGAGGGTATGGA	GTCTCGAGTGTTAAGTTATGGCTTTGAT	pET32a	BL21 (DE3)	70	660	591
atpD	341584388	GTGAATTCGATTCTACGGAAGGGTT	CTCTCGAGTCATCGTATTGACCCTCT	pET32a	BL21 (DE3)	181	1349	1169
capD	341583686	ATGAATTCGCGGTGCTTTCTCGTT	CGCTCGAGATGGGAAGTGTAATCCT	pET32a	BL21 (DE3)	55	942	888
degQ	341583463	TGGAATTCTGGACTGGAACGGGATTT	CGCTCGAGTCATCATGCGACGAGATA	pET32a	BL21 (DE3)	175	1364	1190
folD	341583861	CAGGATCCGAACTTACAAGCCAAAC	CACTCGAGAAACGCAATAGTCATAGGT	pET32a	BL21 (DE3)	70	810	741
groEL	341584155	CAGCATGCGAGCAATCATTCGGTTC	CAGTCGACATACCACCCATGCCTCC	pQE30	M15	121	1634	1514
omp1-1	341583430	GCGAATTCTTATATGCCACCTCACTTT	GCCTCGAGATTTCTAAGATTACGCTCA	pET32a	BL21 (DE3)	202	1173	972
omp1-2	341583430	CGGAATTCGCAATTAGCTTAGCTCCAA	GCCTCGAGATGCTGCGTATCGTCA	pET32a	BL21 (DE3)	1195	2277	1083
ompA-1	341584421	GCGCATGCCTTACGGCATATCATTC	GCGTCGACAAGTAACCGCACCTGTA	pQE30	M15	2320	3673	1354
ompA-2	341584421	CGGCATGCACCGATACACTAACCTTAA	CGGTCGACTCCCGTATTCCATCATTT	pQE30	M15	3850	5284	1435
ompB-1	341584260	ATGCATGCGGTTCAGCTATGGGTG	GCGTCGACATTTGTTAGGCTACTCGC	pQE30	M15	88	1812	1725
ompB-2	341584260	GAGCATGCAATGGCGGTAATGTTGC	CGGTCGACGCTAATACCTGTGCC	pQE30	M15	1909	2955	1047
ompB-3	341584260	ACGCATGCTATGGCTTAGGCACAGG	TCGTCGACCGATTCCGTACTCCATC	pQE30	M15	2932	4884	1953
ompW	341583335	GCGAATTCTTGTTTGTATCCAGCAT	GACTCGAGGTTCATGGTTTTATTACCC	pET32a	BL21 (DE3)	34	678	645
prsA	341584071	CAGGATCCAAAGGCGGTGAAGTA	ATCTCGAGTCCGGCTTTGTTGTC	pET32a	BL21 (DE3)	88	843	756
rfbD	341583685	GCGGATCCAATTCAGCTCGTTCTTAC	TTCTCGAGCCATTCAGGAGGCGTAT	pET32a	BL21 (DE3)	103	819	717
rplA	341583406	GCGGATCCAAGAAAGATGTCGCTGTA	TTCTCGAGTTGTACCGATGCTCCCA	pET32a	BL21 (DE3)	10	696	687
rplY	341584116	CTGGATCCGGAGCAGCAAGAGCATTA	GCCTCGAGTTCAGCGACCTGTTGTTC	pET32a	BL21 (DE3)	52	600	549
rpsB	341583343	GAGAATTCCATTTCGGTCACAAGA	CTCTCGAGTAACGCCTTATCTGTATG	pET32a	BL21 (DE3)	52	753	702
sdhB	341583296	GCGAATTCTTAAGGTTACCGCCAAAT	AACTCGAGACCGTGACGTTCTGCAA	pET32a	BL21 (DE3)	10	780	771
surA	341584211	CTGGATCCTCCGTAAATGATGAACCT	CTCTCGAGCTAAGACGGCAGCATTA	pET32a	BL21 (DE3)	79	888	810
tdpX1	341583679	CGGAATTCAAACTTAGCGATTATGCTGC	TACTCGAGACAAACTTCGCCGTGCTT	pET32a	BL21 (DE3)	88	519	432
tuf	341584196	TAGAATTCGGAGCACAAGCTACAGC	GTCTCGAGTATCTCCAGGCATAACCA	pET32a	BL21 (DE3)	121	1066	946
ybgF	341583540	GTGGATCCGGAGAAAGCGAAACTA	ATCTCGAGCTTGGATGCAGCAGTT	pET32a	BL21 (DE3)	51	690	640
Rh054_00610	341583328	TAGAATTCCTTGCATCGGCTGGTCTT	CGCTCGAGTTCAGTAGCGAGGCTTAC	pET32a	BL21 (DE3)	37	1176	1140
Rh054_02285	341583630	CGGAATTCAATTATGTACCTCAGG	TACTCGAGATTCGTGTCATAAGGAT	pET32a	BL21 (DE3)	121	879	759
Rh054_06655	341584374	ATGCATGCGCGGTTTCAGATCATAAC	CGGTCGACCTTTGCGTATTTCTTCCT	pQE30	M15	94	1603	1510
